# Supplementary material for: UV-B antagonises shade avoidance and increases levels of the flavonoid quercetin in coriander (Coriandrum sativum)
Source: PubMed Central journal article supplement (PMC5736551; doi:10.1038/s41598-017-18073-8), 2017-12-19
Supplement: 41598_2017_18073_MOESM1_ESM.pdf [file 41598_2017_18073_MOESM1_ESM.pdf]

**Supplementary information: UV-B antagonises shade avoidance and increases levels of the flavonoid quercetin in coriander (*Coriandrum sativum*)**

Fraser DP, Sharma A, Fletcher T, Budge S, Moncrieff C, Dodd AN and Franklin KA

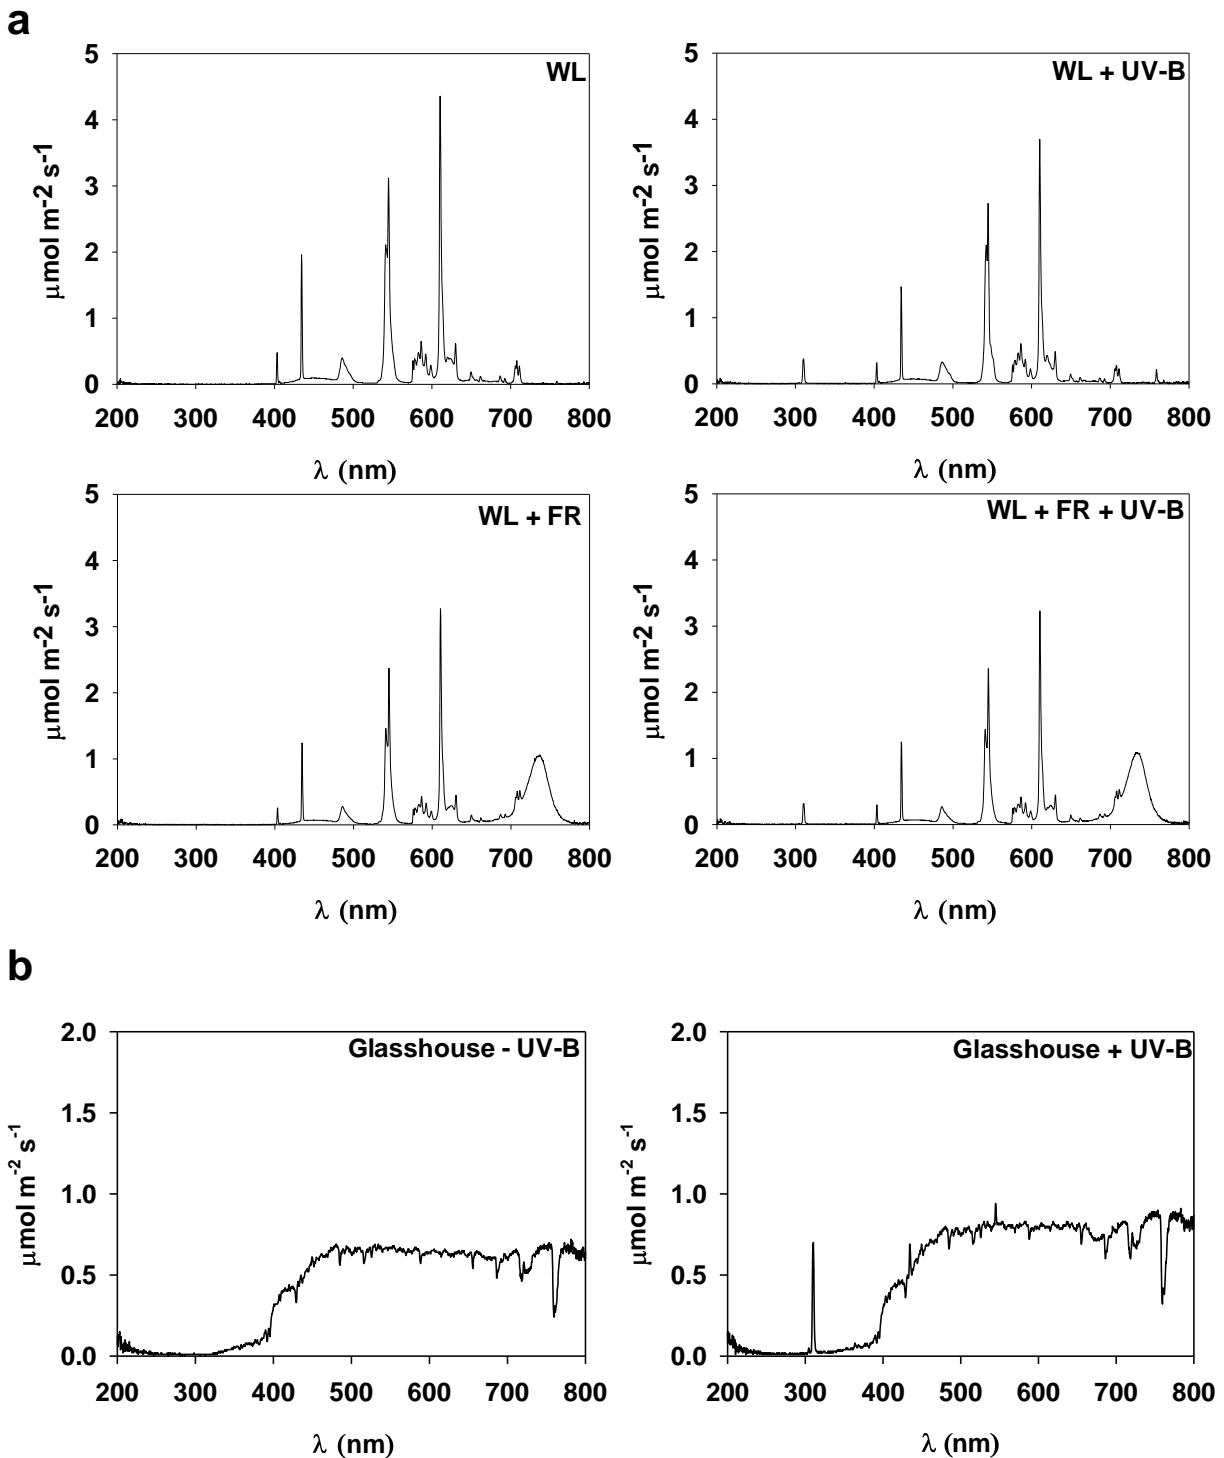

**Figure S1** Light spectra from experimental conditions. **(a)** Growth cabinets.  $70 \mu\text{mol m}^{-2} \text{s}^{-1}$  of white light supplied with fluorescent bulbs was supplemented with far red LEDs to achieve a R:FR of 0.05. UV-B was supplemented at  $1.5 \mu\text{mol m}^{-2} \text{s}^{-1}$  using narrow band fluorescent bulbs. **(b)** Glasshouse. Plants were exposed to ambient light levels typical of spring in Bristol. UV-B was supplemented at  $1.5 \mu\text{mol m}^{-2} \text{s}^{-1}$  using narrow band bulbs. 16 h photoperiods were maintained using white fluorescent bulbs.

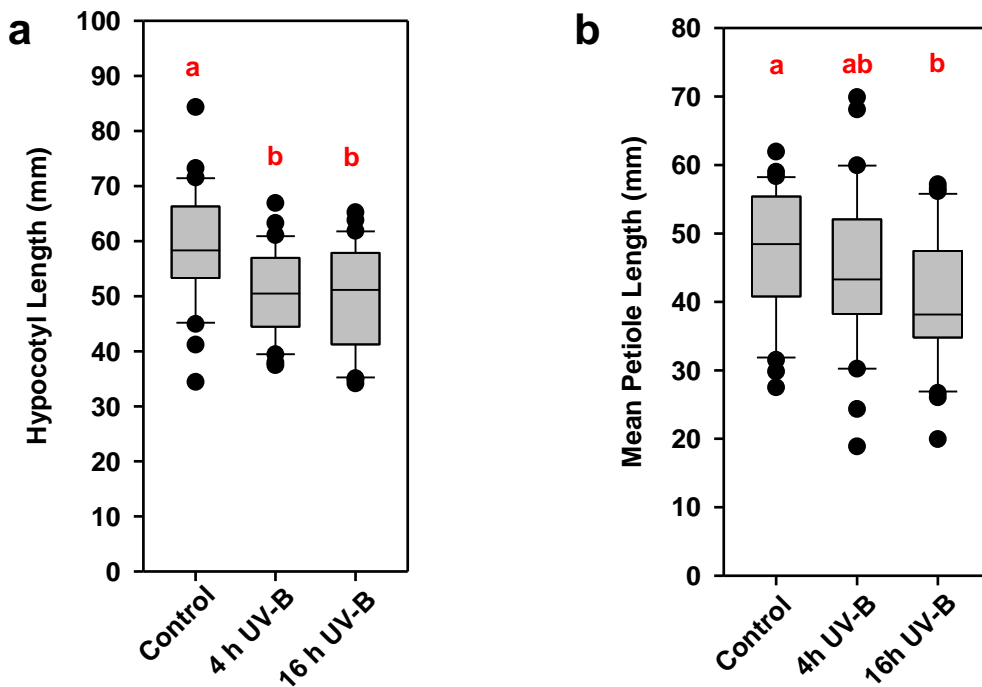

**Figure S2** UV-B inhibits mean petiole elongation in mature coriander grown at high density (4 seedlings 10 cm<sup>-2</sup>) in the glasshouse. Coriander was grown for 32 days with 16 h photoperiods maintained by supplementary lighting. UV-B was provided by narrow band UV-B bulbs for either the entire photoperiod (16 h) or for 4 h at the middle of the day. Plotted are morphological data from 32 day old plants **(a)** Hypocotyl Lengths, ANOVA ( $F(2,87) = 8.551, p < 0.001$ ). **(b)** Mean Petiole Length ANOVA ( $F(2,87) = 4.015, p = 0.021$ ). N = 30. N.S. = no significant difference at  $p = 0.05$ . Different red letters indicate statistically significant differences at  $p < 0.05$ .
